# Supplementary material
Source: PubMed Central journal article supplement (PMC4842119)

SIV-Infected (Day 1)

SIV-Uninfected (Healthy)

P = 0.01

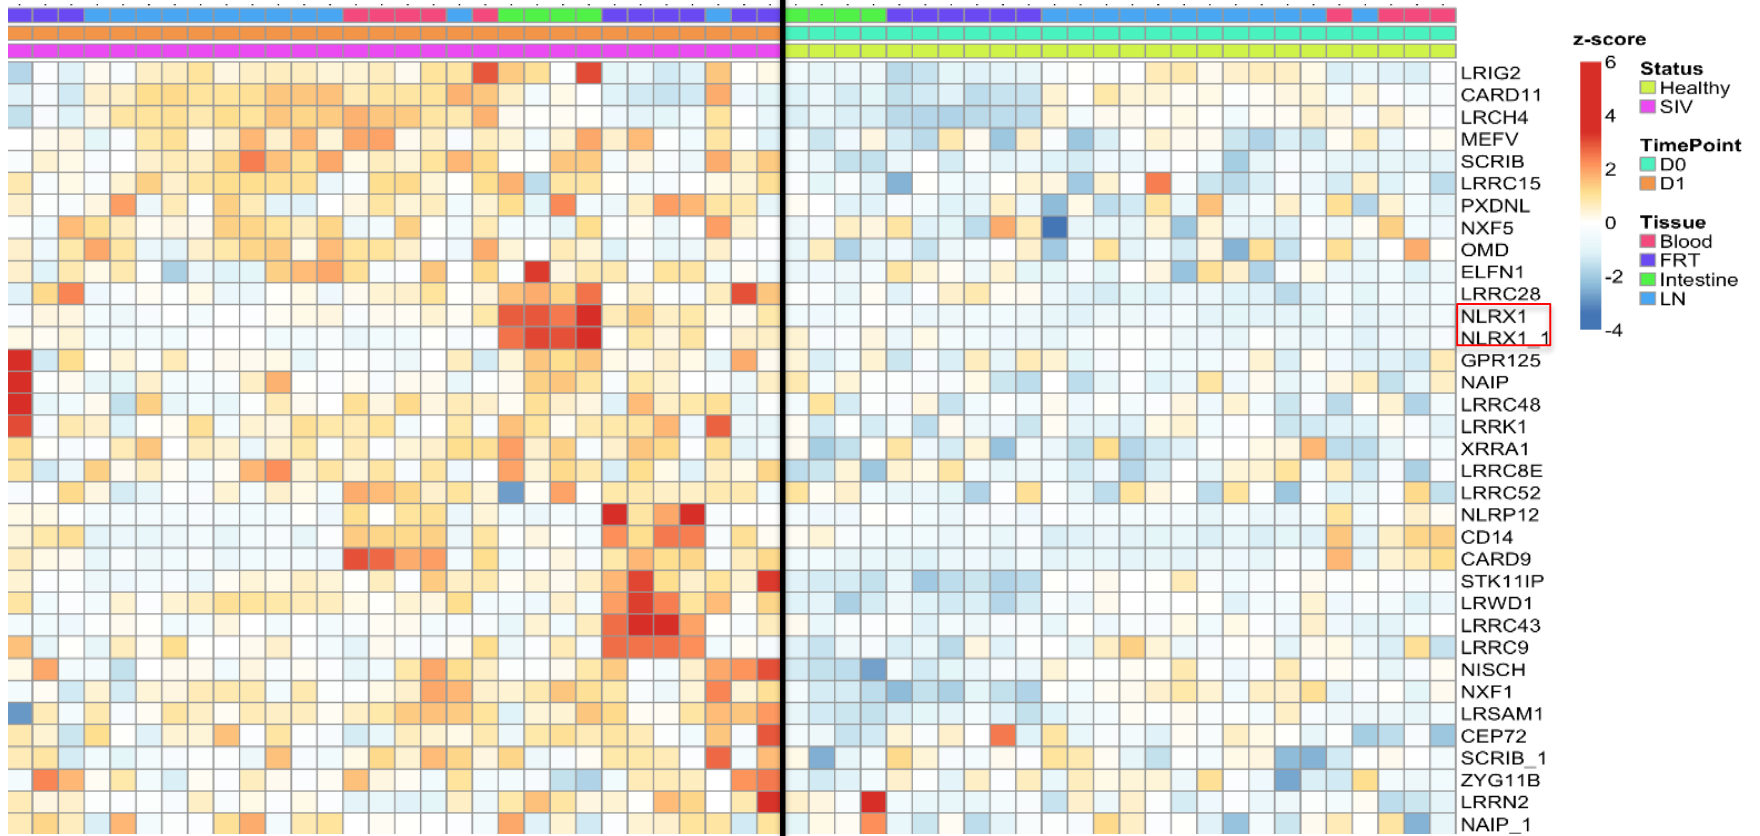

Supplement: NIHMS770809-supplement-7.pdf [file NIHMS770809-supplement-7.pdf]
